# Supplementary material for: Low-frequency and rare variants may contribute to elucidate the genetics of major depressive disorder
Source: PubMed Central journal article supplement (PMC5913271; doi:10.1038/s41398-018-0117-7), 2018-03-27

# Low-frequency and rare variants may contribute to elucidate the genetics of major depressive disorder

## Supplementary Information

Chenglong Yu, Mauricio Arcos-Burgos, Bernhard T. Baune, Volker Arolt, Udo Dannlowski,

Ma-Li Wong, Julio Licinio

This supplementary information includes Table S1 and Figure S1.

**Table S1.** Breakdown of descriptive statistics for MDD cases and controls. Std Err, standard error.

| <b>Cohort</b>     | <b>Status</b> | <b>Sex</b> | <b>Number</b> | <b>Age Mean</b> | <b>Age Std Err</b> |
|-------------------|---------------|------------|---------------|-----------------|--------------------|
| Mexican-American  | MDD           | Male       | 70            | 40.96           | 1.45               |
|                   |               | Female     | 133           | 39.81           | 1.05               |
|                   | Control       | Male       | 80            | 39.34           | 1.36               |
|                   |               | Female     | 116           | 39.03           | 1.13               |
| European-Ancestry | MDD           | Male       | 216           | 38.15           | 0.94               |
|                   |               | Female     | 257           | 39.30           | 0.79               |
|                   | Control       | Male       | 211           | 32.63           | 0.78               |
|                   |               | Female     | 286           | 32.41           | 0.73               |

**Figure S1.** Multi-Dimensional Scaling (MDS) visualization based on Hamming distance for European-ancestry cohort without far outliers.

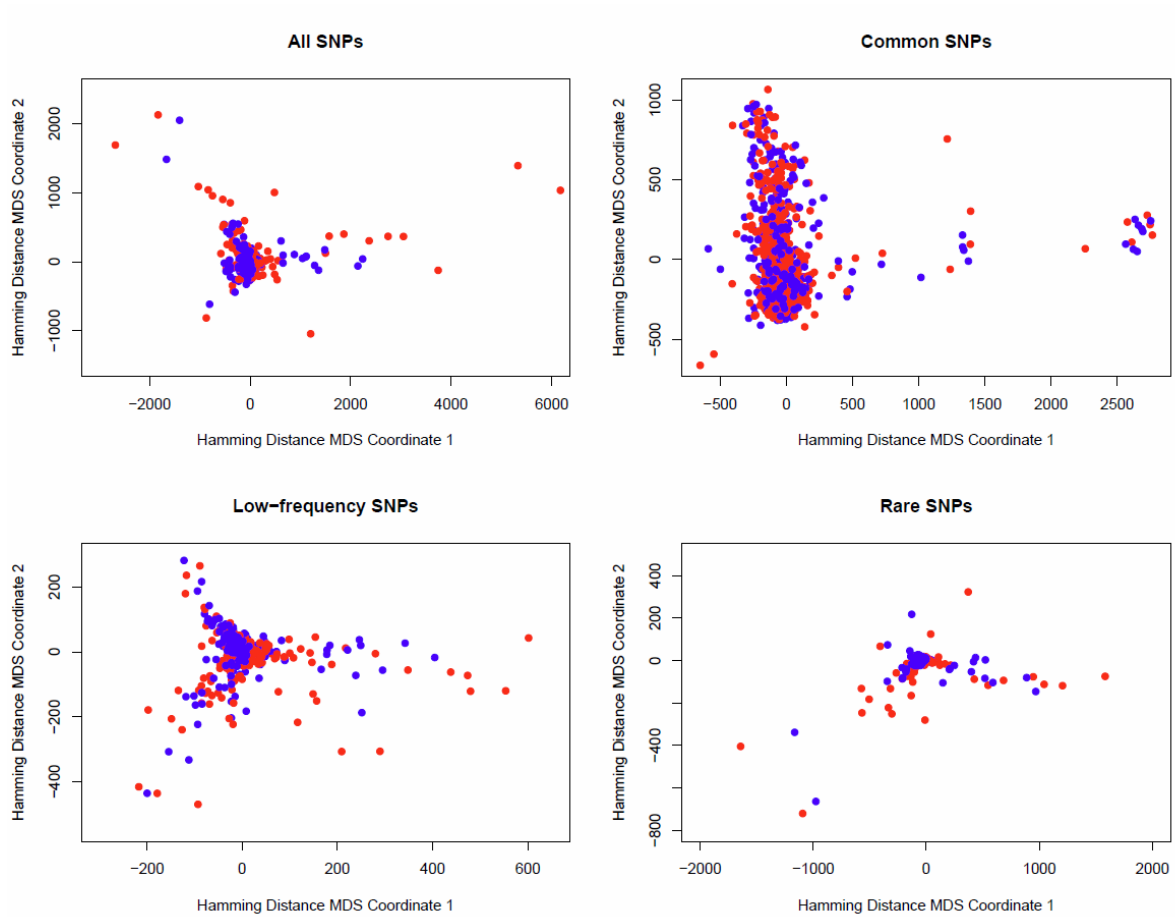

Supplement: 41398_2018_117_MOESM1_ESM.pdf [file 41398_2018_117_MOESM1_ESM.pdf]
